# Supplementary material for: Establishment and Assessment of An Amplicon Sequencing Method Targeting The 16S-ITS-23S rRNA Operon For Analysis of The Equine Gut Microbiome
Source: Research Square preprint supplement (doi:10.21203/rs.3.rs-156589/v1), 2021-02-02
Supplement: Supplementary file 1 [file 3f94e3029f010278d55db4f5.xlsx]

## Sheet: Overview
Supplementary Table 2. rRNA status in complete genomes of genus Cellulosilyticum and Anaerocolumna
GenBank assembly accession	Organism name	Strain name	Assembly level	rRNA status
GCA_000178835.2	Cellulosilyticum lentocellum	DSM 5427	Complete Genome	Mixed (Linked and Unlinked)
GCA_003990395.1	Cellulosilyticum sp.	WCF-2	Complete Genome	Mixed (Linked and Unlinked)
GCA_009931695.1	Anaerocolumna sp.	CBA3638	Complete Genome	Linked
GCA_014218335.1	Anaerocolumna cellulosilytica	SN021	Complete Genome	Linked
GCA_014218355.1	Anaerocolumna sp.	CTTW	Complete Genome	Linked

## Sheet: GCA_000178835.2
Barrnap v. 0.9 results and ITS lengths in GCA_000178835.2
GenBank sequence	rRNA start	rRNA end	Read orientation	rRNA	ITS length	rRNA status
CP002582.1	10454	11974	+	Name=16S_rRNA;product=16S ribosomal RNA	539	Linked
CP002582.1	12514	15411	+	Name=23S_rRNA;product=23S ribosomal RNA
CP002582.1	46240	47760	+	Name=16S_rRNA;product=16S ribosomal RNA	21294	Unlinked
CP002582.1	69055	71961	+	Name=23S_rRNA;product=23S ribosomal RNA
CP002582.1	76843	78364	+	Name=16S_rRNA;product=16S ribosomal RNA	560	Linked
CP002582.1	78925	81826	+	Name=23S_rRNA;product=23S ribosomal RNA
CP002582.1	84397	85922	+	Name=16S_rRNA;product=16S ribosomal RNA	560	Linked
CP002582.1	86483	89383	+	Name=23S_rRNA;product=23S ribosomal RNA
CP002582.1	96772	96881	+	Name=5S_rRNA;product=5S ribosomal RNA
CP002582.1	141504	143026	+	Name=16S_rRNA;product=16S ribosomal RNA	609	Linked
CP002582.1	143636	146535	+	Name=23S_rRNA;product=23S ribosomal RNA
CP002582.1	150984	151082	+	Name=5S_rRNA;product=5S ribosomal RNA
CP002582.1	151624	153153	+	Name=16S_rRNA;product=16S ribosomal RNA	615	Linked
CP002582.1	153769	156668	+	Name=23S_rRNA;product=23S ribosomal RNA
CP002582.1	422556	424078	+	Name=16S_rRNA;product=16S ribosomal RNA	113909	Unlinked
CP002582.1	537988	540887	+	Name=23S_rRNA;product=23S ribosomal RNA
CP002582.1	571989	573512	+	Name=16S_rRNA;product=16S ribosomal RNA	559	Linked
CP002582.1	574072	576972	+	Name=23S_rRNA;product=23S ribosomal RNA
CP002582.1	602283	603805	+	Name=16S_rRNA;product=16S ribosomal RNA	11279	Unlinked
CP002582.1	615085	617984	+	Name=23S_rRNA;product=23S ribosomal RNA
CP002582.1	1229189	1230711	+	Name=16S_rRNA;product=16S ribosomal RNA	668	Linked
CP002582.1	1231380	1234279	+	Name=23S_rRNA;product=23S ribosomal RNA
CP002582.1	3256964	3254064	-	Name=23S_rRNA;product=23S ribosomal RNA	Uncoupled	Unlinked
CP002582.1	3623565	3620666	-	Name=23S_rRNA;product=23S ribosomal RNA	668	Linked
CP002582.1	3625756	3624234	-	Name=16S_rRNA;product=16S ribosomal RNA

## Sheet: GCA_003990395.1
Barrnap v. 0.9 results and ITS lengths in GCA_003990395.1
GenBank sequence	rRNA start	rRNA end	Read orientation	rRNA	ITS length	rRNA status
CP034675.1	667438	668959	+	Name=16S_rRNA;product=16S ribosomal RNA	508	Linked
CP034675.1	669468	672366	+	Name=23S_rRNA;product=23S ribosomal RNA
CP034675.1	701833	703355	+	Name=16S_rRNA;product=16S ribosomal RNA	21380	Unlinked
CP034675.1	724736	727634	+	Name=23S_rRNA;product=23S ribosomal RNA
CP034675.1	730197	731719	+	Name=16S_rRNA;product=16S ribosomal RNA	454	Linked
CP034675.1	732174	735069	+	Name=23S_rRNA;product=23S ribosomal RNA
CP034675.1	739951	741472	+	Name=16S_rRNA;product=16S ribosomal RNA	624	Linked
CP034675.1	742097	744995	+	Name=23S_rRNA;product=23S ribosomal RNA
CP034675.1	752384	752494	+	Name=5S_rRNA;product=5S ribosomal RNA
CP034675.1	802396	803918	+	Name=16S_rRNA;product=16S ribosomal RNA	603	Linked
CP034675.1	804522	807420	+	Name=23S_rRNA;product=23S ribosomal RNA
CP034675.1	811871	811969	+	Name=5S_rRNA;product=5S ribosomal RNA
CP034675.1	812513	814035	+	Name=16S_rRNA;product=16S ribosomal RNA	615	Linked
CP034675.1	814651	817549	+	Name=23S_rRNA;product=23S ribosomal RNA
CP034675.1	1134646	1136169	+	Name=16S_rRNA;product=16S ribosomal RNA	92793	Unlinked
CP034675.1	1228963	1231861	+	Name=23S_rRNA;product=23S ribosomal RNA
CP034675.1	1266458	1267980	+	Name=16S_rRNA;product=16S ribosomal RNA	709	Linked
CP034675.1	1268690	1271588	+	Name=23S_rRNA;product=23S ribosomal RNA
CP034675.1	1299183	1300705	+	Name=16S_rRNA;product=16S ribosomal RNA	9306	Unlinked
CP034675.1	1310012	1312907	+	Name=23S_rRNA;product=23S ribosomal RNA
CP034675.1	1838916	1840438	+	Name=16S_rRNA;product=16S ribosomal RNA	701	Linked
CP034675.1	1841140	1844036	+	Name=23S_rRNA;product=23S ribosomal RNA
CP034675.1	3963672	3960775	-	Name=23S_rRNA;product=23S ribosomal RNA	Uncoupled	Unlinked
CP034675.1	4373119	4370223	-	Name=23S_rRNA;product=23S ribosomal RNA	702	Linked
CP034675.1	4375342	4373822	-	Name=16S_rRNA;product=16S ribosomal RNA

## Sheet: GCA_009931695.1
Barrnap v. 0.9 results and ITS lengths in GCA_009931695.1
GenBank sequence	rRNA start	rRNA end	Read orientation	rRNA	ITS length	rRNA status
CP048000.1	619953	617056	-	Name=23S_rRNA;product=23S ribosomal RNA	885	Linked
CP048000.1	620440	620343	-	Name=5S_rRNA;product=5S ribosomal RNA
CP048000.1	622280	620839	-	Name=16S_rRNA;product=16S ribosomal RNA
CP048000.1	625990	623036	-	Name=23S_rRNA;product=23S ribosomal RNA	1034	Linked
CP048000.1	626479	626382	-	Name=5S_rRNA;product=5S ribosomal RNA
CP048000.1	628465	627025	-	Name=16S_rRNA;product=16S ribosomal RNA
CP048000.1	738230	735274	-	Name=23S_rRNA;product=23S ribosomal RNA	1038	Linked
CP048000.1	738886	738789	-	Name=5S_rRNA;product=5S ribosomal RNA
CP048000.1	740710	739269	-	Name=16S_rRNA;product=16S ribosomal RNA
CP048000.1	1105752	1102798	-	Name=23S_rRNA;product=23S ribosomal RNA	831	Linked
CP048000.1	1106185	1106088	-	Name=5S_rRNA;product=5S ribosomal RNA
CP048000.1	1108024	1106584	-	Name=16S_rRNA;product=16S ribosomal RNA
CP048000.1	1202392	1199493	-	Name=23S_rRNA;product=23S ribosomal RNA	897	Linked
CP048000.1	1202907	1202810	-	Name=5S_rRNA;product=5S ribosomal RNA
CP048000.1	1204730	1203290	-	Name=16S_rRNA;product=16S ribosomal RNA
CP048000.1	1874565	1873125	+	Name=16S_rRNA;product=16S ribosomal RNA	1097	Linked
CP048000.1	1875174	1875271	+	Name=5S_rRNA;product=5S ribosomal RNA
CP048000.1	1875663	1878617	+	Name=23S_rRNA;product=23S ribosomal RNA
CP048000.1	4169258	4166305	-	Name=23S_rRNA;product=23S ribosomal RNA	1150	Linked
CP048000.1	4169914	4169817	-	Name=5S_rRNA;product=5S ribosomal RNA
CP048000.1	4171850	4170409	-	Name=16S_rRNA;product=16S ribosomal RNA

## Sheet: GCA_014218335.1
Barrnap v. 0.9 results and ITS lengths in GCA_014218335.1
GenBank sequence	rRNA start	rRNA end	Read orientation	rRNA	ITS length	rRNA status
AP023367.1	11884	13411	+	Name=16S_rRNA;product=16S ribosomal RNA	696	Linked
AP023367.1	13590	13686	+	Name=5S_rRNA;product=5S ribosomal RNA
AP023367.1	14108	17017	+	Name=23S_rRNA;product=23S ribosomal RNA
AP023367.1	803972	805499	+	Name=16S_rRNA;product=16S ribosomal RNA	503	Linked
AP023367.1	805586	805682	+	Name=5S_rRNA;product=5S ribosomal RNA
AP023367.1	806003	808912	+	Name=23S_rRNA;product=23S ribosomal RNA
AP023367.1	3774480	3771571	-	Name=23S_rRNA;product=23S ribosomal RNA	714	Linked
AP023367.1	3775109	3775013	-	Name=5S_rRNA;product=5S ribosomal RNA
AP023367.1	3776722	3775195	-	Name=16S_rRNA;product=16S ribosomal RNA
AP023367.1	4824919	4822010	-	Name=23S_rRNA;product=23S ribosomal RNA	503	Linked
AP023367.1	4825336	4825240	-	Name=5S_rRNA;product=5S ribosomal RNA
AP023367.1	4826950	4825423	-	Name=16S_rRNA;product=16S ribosomal RNA
AP023367.1	5017438	5014529	-	Name=23S_rRNA;product=23S ribosomal RNA	719	Linked
AP023367.1	5018071	5017975	-	Name=5S_rRNA;product=5S ribosomal RNA
AP023367.1	5019685	5018158	-	Name=16S_rRNA;product=16S ribosomal RNA
AP023367.1	5267157	5264248	-	Name=23S_rRNA;product=23S ribosomal RNA	646	Linked
AP023367.1	5267607	5267511	-	Name=5S_rRNA;product=5S ribosomal RNA
AP023367.1	5269331	5267804	-	Name=16S_rRNA;product=16S ribosomal RNA

## Sheet: GCA_014218355.1
Barrnap v. 0.9 results and ITS lengths in GCA_014218355.1
GenBank sequence	rRNA start	rRNA end	Read orientation	rRNA	ITS length	rRNA status
AP023368.1	11302	12832	+	Name=16S_rRNA;product=16S ribosomal RNA	697	Linked
AP023368.1	13038	13136	+	Name=5S_rRNA;product=5S ribosomal RNA
AP023368.1	13530	16440	+	Name=23S_rRNA;product=23S ribosomal RNA
AP023368.1	113506	115036	+	Name=16S_rRNA;product=16S ribosomal RNA	614	Linked
AP023368.1	115252	115350	+	Name=5S_rRNA;product=5S ribosomal RNA
AP023368.1	115651	118561	+	Name=23S_rRNA;product=23S ribosomal RNA
AP023368.1	497406	498936	+	Name=16S_rRNA;product=16S ribosomal RNA	693	Linked
AP023368.1	499002	499100	+	Name=5S_rRNA;product=5S ribosomal RNA
AP023368.1	499630	502540	+	Name=23S_rRNA;product=23S ribosomal RNA
AP023368.1	609979	611508	+	Name=16S_rRNA;product=16S ribosomal RNA	642	Linked
AP023368.1	611724	611822	+	Name=5S_rRNA;product=5S ribosomal RNA
AP023368.1	612151	615059	+	Name=23S_rRNA;product=23S ribosomal RNA
AP023368.1	3903630	3900720	-	Name=23S_rRNA;product=23S ribosomal RNA	740	Linked
AP023368.1	3904154	3904056	-	Name=5S_rRNA;product=5S ribosomal RNA
AP023368.1	3905901	3904371	-	Name=16S_rRNA;product=16S ribosomal RNA
AP023368.1	4777715	4774805	-	Name=23S_rRNA;product=23S ribosomal RNA	543	Linked
AP023368.1	4778193	4778095	-	Name=5S_rRNA;product=5S ribosomal RNA
AP023368.1	4779788	4778259	-	Name=16S_rRNA;product=16S ribosomal RNA
